# Supplementary material
Source: Preprints.org preprint supplement (doi:10.20944/preprints202010.0599.v1)
Supplement: Supplementary file 1 [file supplementary]

**Supplements:**

Table S1: Parameters of purchased potting soil

| Parameter | Commercial Potting Soil |
| --- | --- |
| pH | 5.8 |
| Organic Material | 65% |
| Salt Content | 2.0 mg/L |
| Nitrogen | 250 mg/L |
| Phosphorus P2O5 | 250 mg/L |
| Potassium Oxide K2O | 450 mg/L |
| Magnesium | 170 mg/L |
| Sulfur | 130 mg/L |

Table S2: Soil analysis results

| Parameter (%Total Mass) | Yard Soil | Swamp | Forest Soil 1 | Forest Soil 2 | Beach Sand |
| --- | --- | --- | --- | --- | --- |
| **pH** | **6.7** | **5.1** | **4.1** | **3.2** | **6.6** |
| Potassium | 0.046 | 0.025 | 0.053 | 0.034 | 0.017 |
| Magnesium | 0.086 | 0.092 | 0.053 | 0.04 | 0.057 |
| **Organic material** | **2.4** | **71.8** | **14.4** | **30.9** | **0.1** |
| Phosphorus | 0.094 | 0.088 | 0.037 | 0.050 | 0.016 |
| Nitrogen | 0.12 | 2.25 | 0.034 | 0.80 | N/A |
| Sulfur | 0.02 | 0.77 | 0.04 | 0.09 | 0.0044 |
